# Supplementary material
Source: PubMed Central journal article supplement (PMC6676949)
Supplement: dey328suppl_table1.pdf [file dey328suppl_table1.pdf]

**Supplementary Table S1** Estimated percent changes and 95% CIs for semen quality parameters associated with underweight, overweight and obesity compared with normal weight based on Chinese criteria for BMI category<sup>a</sup>.

| Characteristic                            | Underweight ( <i>n</i> = 1815) |          | Normal ( <i>n</i> = 19 976)<br>Percent change<br>(95% CI) | Overweight ( <i>n</i> = 7068) |          | Obese ( <i>n</i> = 1090)   |          |
|-------------------------------------------|--------------------------------|----------|-----------------------------------------------------------|-------------------------------|----------|----------------------------|----------|
|                                           | Percent change<br>(95% CI)     | <i>P</i> |                                                           | Percent change<br>(95% CI)    | <i>P</i> | Percent change<br>(95% CI) | <i>P</i> |
| Semen volume, ml                          | -3.7 (-7.9, 0.6)               | 0.09     | 0 (ref.)                                                  | -3.2 (-5.6, -0.8)             | 0.009    | -1.9 (-7.1, 3.5)           | 0.48     |
| Sperm concentration, 10 <sup>6</sup> /ml  | -3.0 (-5.8, -0.1)              | 0.043    | 0 (ref.)                                                  | 0.4 (-1.3, 2.0)               | 0.65     | -0.5 (-4.1, 3.2)           | 0.79     |
| Total sperm number, 10 <sup>6</sup>       | -6.8 (-11.4, -2.0)             | 0.006    | 0 (ref.)                                                  | -2.8 (-5.5, -0.0)             | 0.048    | -2.7 (-8.6, 3.5)           | 0.39     |
| Total motility, %                         | -0.7 (-2.1, 0.7)               | 0.33     | 0 (ref.)                                                  | 0.2 (-0.6, 1.0)               | 0.56     | 0.5 (-1.3, 2.3)            | 0.60     |
| Progressive motility, %                   | -0.6 (-2.1, 1.0)               | 0.46     | 0 (ref.)                                                  | 0.3 (-0.6, 1.2)               | 0.52     | 0.8 (-1.1, 2.8)            | 0.40     |
| Total motile sperm count, 10 <sup>6</sup> | -7.5 (-12.5, -2.3)             | 0.006    | 0 (ref.)                                                  | -2.6 (-5.5, 0.5)              | 0.10     | -2.1 (-8.5, 4.8)           | 0.54     |

*N* refers to the number of subjects in each BMI category.

<sup>a</sup>BMI was categorized using the Chinese criteria: underweight (<18.5 kg/m<sup>2</sup>), normal weight (18.5–23.9 kg/m<sup>2</sup>), overweight (24–27.9 kg/m<sup>2</sup>) and obese (≥28 kg/m<sup>2</sup>). The number of underweight, normal weight, overweight and obese subjects were 222, 2677, 923 and 144, respectively. Linear mixed models were used to estimate percent changes and 95% CIs with adjustment for age, ethnicity, education, smoking, marital status, abstinence period and season.
