# Supplementary material
Source: PubMed Central journal article supplement (PMC6676949)
Supplement: dey328suppl_table2.pdf [file dey328suppl_table2.pdf]

**Table SII** Estimated percent changes and 95% CIs for semen quality parameters associated with underweight, overweight and obesity compared with normal weight in non-smoking sperm donors<sup>a</sup>.

| Characteristic                            | Underweight                |       | Normal<br>Percent change<br>(95% CI) | Overweight                 |       | Obese                      |      |
|-------------------------------------------|----------------------------|-------|--------------------------------------|----------------------------|-------|----------------------------|------|
|                                           | Percent change<br>(95% CI) | P     |                                      | Percent change<br>(95% CI) | P     | Percent change<br>(95% CI) | P    |
| Semen volume, ml                          | -5.3 (-10.4, 0.1)          | 0.054 | 0 (ref.)                             | -4.7 (-7.8, -1.4)          | 0.005 | 4.4 (-8.1, 18.6)           | 0.51 |
| Sperm concentration, 10 <sup>6</sup> /ml  | -2.5 (-6.0, 1.0)           | 0.16  | 0 (ref.)                             | -0.3 (-2.4, 1.9)           | 0.81  | 0.0 (-8.0, 8.7)            | 0.99 |
| Total sperm number, 10 <sup>6</sup>       | -8.0 (-13.5, -2.1)         | 0.009 | 0 (ref.)                             | -5.0 (-8.5, -1.3)          | 0.008 | 3.8 (-10.1, 19.9)          | 0.61 |
| Total motility, %                         | -0.3 (-2.1, 1.6)           | 0.74  | 0 (ref.)                             | -0.0 (-1.1, 1.1)           | 0.99  | 1.7 (-2.6, 6.1)            | 0.44 |
| Progressive motility, %                   | -0.0 (-2.0, 2.0)           | 0.96  | 0 (ref.)                             | 0.2 (-1.0, 1.5)            | 0.70  | 1.3 (-3.4, 6.1)            | 0.60 |
| Total motile sperm count, 10 <sup>6</sup> | -8.3 (-14.3, -1.7)         | 0.014 | 0 (ref.)                             | -5.0 (-8.9, -1.0)          | 0.015 | 5.9 (-9.6, 24.0)           | 0.48 |

<sup>a</sup>BMI was categorized using the WHO criteria. Linear mixed models were used to estimate percent changes and 95% CIs with adjustment for age, ethnicity, education, marital status, abstinence period and season.
