# Supplementary material
Source: PubMed Central journal article supplement (PMC6676949)
Supplement: dey328suppl_table3.pdf [file dey328suppl_table3.pdf]

**Supplementary Table SIII** Estimated percent changes and 95% CIs for semen quality parameters (using first sample only) associated with underweight, overweight and obesity compared with normal weight<sup>a</sup>.

| Characteristic                            | Underweight                |        | Normal<br>Percent change<br>(95% CI) | Overweight                 |       | Obese                      |      |
|-------------------------------------------|----------------------------|--------|--------------------------------------|----------------------------|-------|----------------------------|------|
|                                           | Percent change<br>(95% CI) | P      |                                      | Percent change<br>(95% CI) | P     | Percent change<br>(95% CI) | P    |
| Semen volume, ml                          | -11.6 (-17.8, -5.0)        | <0.001 | 0 (ref.)                             | -7.0 (-11.0, -2.8)         | 0.001 | 6.4 (-9.9, 25.8)           | 0.46 |
| Sperm concentration, 10 <sup>6</sup> /ml  | -5.2 (-11.8, 2.0)          | 0.15   | 0 (ref.)                             | -0.2 (-4.5, 4.4)           | 0.94  | 12.9 (-4.5, 33.4)          | 0.15 |
| Total sperm number, 10 <sup>6</sup>       | -16.1 (-24.8, -6.5)        | 0.002  | 0 (ref.)                             | -7.2 (-13.2, -0.7)         | 0.030 | 20.1 (-6.6, 54.6)          | 0.15 |
| Total motility, %                         | -1.4 (-3.9, 1.1)           | 0.27   | 0 (ref.)                             | -0.2 (-1.8, 1.3)           | 0.76  | 0.1 (-5.6, 6.2)            | 0.96 |
| Progressive motility, %                   | -1.2 (-4.0, 1.6)           | 0.40   | 0 (ref.)                             | -0.0 (-1.8, 1.7)           | 0.97  | 0.9 (-5.7, 7.7)            | 0.80 |
| Total motile sperm count, 10 <sup>6</sup> | -17.3 (-26.2, -7.4)        | 0.001  | 0 (ref.)                             | -7.4 (-13.6, -0.7)         | 0.03  | 20.3 (-7.5, 56.5)          | 0.17 |

<sup>a</sup>BMI was categorized using the WHO criteria: underweight (<18.5 kg/m<sup>2</sup>), normal weight (18.5–24.9 kg/m<sup>2</sup>), overweight (25–29.9 kg/m<sup>2</sup>) and obese (≥30 kg/m<sup>2</sup>). Linear regression models were used to estimate percent changes and 95% CIs with adjustment for age, ethnicity, education, smoking, marital status, abstinence period and season.
